1 **Identification of essential oils with activity against stationary phase *Staphylococcus***  
2 ***aureus***

3 Shuzhen Xiao<sup>1,2</sup>, Peng Cui<sup>1</sup>, Wanliang Shi<sup>1</sup>, Ying Zhang<sup>1\*</sup>

4  
5 <sup>1</sup> Department of Molecular Microbiology and Immunology, Bloomberg School of Public  
6 Health, Johns Hopkins University, Baltimore, MD 21205, USA

7 <sup>2</sup> Department of Clinical Microbiology, Ruijin Hospital, Shanghai Jiao Tong University  
8 School of Medicine, Shanghai 200025, China

9  
10 \*Correspondence:

11 Ying Zhang, MD, PhD

12 Email: yzhang@jhsph.edu; Tel.: +1-410-614-2975.

13  
14 **Keywords:** *Staphylococcus aureus*; stationary phase; essential oils; antimicrobial activity

15  
16 **Abstract**

17 *Staphylococcus aureus* is the most dominant human pathogen, responsible for a variety of  
18 chronic and severe infections. There is mounting evidence that persisters are associated with  
19 treatment failure and relapse of persistent infections. While some essential oils were reported  
20 to have antimicrobial activity against growing *S. aureus*, activity of essential oils against the  
21 non-growing stationary phase *S. aureus* enriched in persisters has not been investigated. In  
22 this study, we evaluated the activity of 143 essential oils against stationary phase *S. aureus*  
23 and identified 39 essential oils (Cinnamon bark, Oregano, Thyme white, Bandit "Thieves",  
24 Lemongrass (*Cymbopogon flexuosus*), Sandalwood oil, Health shield, Allspice, Amyris,  
25 Palmarosa, Cinnamon leaf, Clove bud, Citronella, Geranium bourbon, Marjoram, Peppermint,  
26 Lemongrass (*Cymbopogon citratus*), Cornmint, Elemi, Ho wood, Head ease, Lemon  
27 eucalyptus, *Litsea cubeba*, Myrrh, Parsley seed, Coriander oil, Dillweed, Hyssop, Neroli,  
28 Rosewood oil, Tea tree, Cajeput, Glove bud, Lavender, Sleep tight, Vetiver, *Palo santo*, Sage  
29 oil, Yarrow) at 0.5% concentration, 10 essential oils (Cinnamon bark, Oregano, Thyme white,  
30 Bandit "Thieves", Lemongrass (*Cymbopogon flexuosus*), Sandalwood oil, Health shield,  
31 Allspice, Amyris, Palmarosa) at 0.25% concentration, and 7 essential oils (Cinnamon bark,  
32 Oregano, Thyme white, Lemongrass (*Cymbopogon flexuosus*), Allspice, Amyris, Palmarosa)  
33 at 0.125% concentration to have high activity against stationary phase *S. aureus* with no  
34 visible growth on agar plates after five-day exposure. Among the 10 essential oils which  
35 showed high activity at 0.25% concentration, 9 (Cinnamon bark, Oregano, Thyme white,  
36 Bandit "Thieves", Lemongrass (*Cymbopogon flexuosus*), Health shield, Allspice, Palmarosa,  
37 Amyris) showed higher activity than the known persister drug tosylfloxacin, while the other  
38 one (Sandalwood oil) was found to be active at a higher concentration. In Oregano essential  
39 oil drug combination studies with clinical antibiotics, Oregano plus quinolone drugs  
40 (tosylfloxacin, levofloxacin, ciprofloxacin) and rifampin completely eradicated all stationary  
41 phase *S. aureus* cells, but had no apparent enhancement for linezolid, vancomycin,  
42 sulfamethoxazole, trimethoprim, azithromycin and gentamicin. Our findings may facilitate  
43 development of more effective treatment for persistent *S. aureus* infections.

## 44 **Introduction**

45 *Staphylococcus aureus* is the leading cause of nosocomial and community-associated  
46 infections, which is responsible for a wide variety of infections that include mild superficial  
47 skin infections, osteomyelitis, implant-associated heart valve, native valve endocarditis,  
48 severe sepsis and bacteremia [1]. Although antibiotic resistance is a major problem in  
49 treatment of infections caused by *S. aureus*, drug-tolerant persisters are demonstrated to be  
50 significant contributors of chronic persistent infections and recurrent infections [2]. Clinically,  
51 infections caused by *S. aureus* such as soft tissue infections, endocarditis, osteomyelitis,  
52 prosthetic joint infections, and biofilm-related infections on indwelling device is difficult to  
53 cure with the current antibiotics, which are mainly active against the growing bacteria but  
54 have poor activity against the non-growing persisters [3]. Recently, it has been shown that a  
55 drug combination approach using drugs targeting both log phase growing bacteria and the  
56 non-growing stationary phase bacteria could more effectively eradicate a persistent urinary  
57 tract infection and a biofilm skin infection in the mouse models [4, 5]. However, the choice of  
58 persister drugs is limited at present, and treatment of persistent infections remains a challenge.  
59 Although some essential oils were found to be active against growing *S. aureus* [6-8], the  
60 activity of essential oils against non-growing stationary phase *S. aureus* has not been studied.  
61 Because activity against non-growing persisters or stationary phase bacteria correlates with in  
62 vivo activity against persistent infections in the context of drug combination in the case of  
63 uropathogenic *E. coli* and *B. burgdorferi* persistent infections [4, 9, 10], here, we evaluated a  
64 panel of 143 essential oils for their activity against stationary phase *S. aureus* as a model for  
65 activity against *S. aureus* persisters. We identified a range of highly potent essential oils with  
66 excellent activity against non-growing stationary phase *S. aureus*.

67

## 68 **Materials and Methods**

69

### 70 **Bacterial strain**

71 *S. aureus* Newman, a commonly used pan-susceptible strain isolated from a patient suffering  
72 from osteomyelitis [3] was used in this study. The strain was incubated in Tryptic Soy Broth  
73 (TSB) medium overnight to stationary phase without shaking at 37 °C, 5% CO<sub>2</sub>. The  
74 stationary phase *S. aureus* culture (~10<sup>9</sup> CFU/mL) was used directly without dilution for  
75 essential oil screens and drug exposure tests.

76

### 77 **Antibiotics and essential oils**

78 Tosufloxacin, ciprofloxacin, levofloxacin, rifampin, linezolid, vancomycin, sulfamethoxazole,  
79 trimethoprim, azithromycin and gentamicin were purchased from Sigma-Aldrich (St. Louis,  
80 MO, USA) and dissolved in dimethyl sulfoxide (DMSO) or H<sub>2</sub>O to form stock solutions. All  
81 antibiotic stocks (except DMSO stocks) were filter-sterilized by 0.2 µm filter and stored at  
82 -20°C.

83

84 Commercially available essential oils were purchased from Natural Acres (MO, USA), Plant  
85 Therapy (ID, USA) and Plant Guru (NJ, USA). More information about the essential oils can  
86 be found on their websites (<http://www.theplantguru.com/gc-ms-testing>,  
87 <http://www.planttherapy.com/essential-oils>, <http://naturalacres.com/collections/all>).

88 DMSO-soluble essential oils were dissolved in DMSO at 5% (v/v). DMSO-insoluble  
89 essential oils were directly added to *S. aureus* cultures, then vortexed to form aqueous  
90 suspension. The 5% essential oils or aqueous suspension were further diluted into the  
91 bacterial cultures to achieve desired dilution in the following drug exposure or MIC  
92 experiments to evaluate their activity against non-growing stationary phase or growing log  
93 phase *S. aureus*.

94

#### 95 **Screening of essential oils for their activity against stationary phase *S. aureus***

96 To evaluate the effect of essential oils on stationary phase bacteria, the essential oils and  
97 drugs were added to the 96-well plates containing stationary phase bacteria, leaving the first  
98 and last columns in each plate blank for control. In the primary screen, each essential oil was  
99 assayed at three concentrations: 0.5%, 0.25% and 0.125% (v/v). Tosufloxacin, ciprofloxacin,  
100 levofloxacin, rifampin, linezolid, vancomycin, sulfamethoxazole, trimethoprim, azithromycin  
101 and gentamicin were used at 50  $\mu\text{M}$  as control antibiotics. The plates were incubated at 37 °C,  
102 5% CO<sub>2</sub> without shaking. After three days and five days of exposure to essential oils or drugs,  
103 the bacterial suspension was transferred to TSB plates with a 96-pin replicator to monitor the  
104 bacterial survival and regrowth after further incubation at 37 °C. All tests were run in  
105 triplicate.

106

#### 107 **Antibiotic susceptibility test**

108 The minimum inhibitory concentrations (MICs) were determined using microdilution method  
109 according to the CLSI guideline [11]. Essential oils were 2-fold diluted from 1% to 0.0075%.  
110 Gentamicin was 2-fold diluted from 512  $\mu\text{g}/\text{mL}$  to 0.25  $\mu\text{g}/\text{mL}$  as a control antibiotic. The  
111 96-well plates were sealed and incubated at 37 °C overnight without shaking. All experiments  
112 were run in triplicate.

113

#### 114 **Validation of active essential oils by colony forming unit (CFU) assay**

115 The stationary phase bacteria were transferred into Eppendorf tubes. Essential oils were  
116 added at 0.25% and 0.125% concentrations. Tosufloxacin, ciprofloxacin, levofloxacin,  
117 rifampin, linezolid, vancomycin, sulfamethoxazole, trimethoprim, azithromycin and  
118 gentamicin were added to bacterial suspensions at the final concentration of 20  $\mu\text{M}$ ,  
119 respectively. At different time points, 100  $\mu\text{L}$  bacterial suspensions were collected by  
120 centrifugation, washed and resuspended in PBS. After serial dilutions, 10  $\mu\text{L}$  of each dilution  
121 was plated on TSB plate for CFU count.

122

#### 123 **Drug combination assay on stationary phase *S. aureus***

124 In this study, we used Oregano as the common element to test the activity of various  
125 two-drug combinations in killing *S. aureus* Newman stationary phase cells. We evaluated  
126 tosufloxacin, levofloxacin, ciprofloxacin, rifampin, linezolid, vancomycin, sulfamethoxazole,  
127 trimethoprim, azithromycin and gentamicin at the final concentration of 5  $\mu\text{g}/\text{mL}$  in  
128 combination with Oregano (0.025%). The designed drug combinations or single drug controls  
129 were added directly to stationary phase culture and CFU count was performed at different  
130 time points.

131

132

## 133 **Results**

134

### 135 **Identification of active essential oils against stationary phase *S. aureus***

136 Consistent with our previous study [3], tosufloxacin was shown to have high activity against  
137 stationary phase *S. aureus*, while other clinical drugs including ciprofloxacin, levofloxacin,  
138 rifampin, linezolid, vancomycin, sulfamethoxazole, trimethoprim, azithromycin and  
139 gentamicin were not able to completely kill stationary phase *S. aureus* at 50  $\mu$ M after  
140 five-day drug exposure [8]. Interestingly, after three-day exposure, 30 (Cinnamon bark,  
141 Oregano, Thyme white, Lemongrass (*Cymbopogon flexuosus*), Bandit "Thieves",  
142 Sandalwood oil, Health shield, Allspice, Amyris, Palmarosa, Cinnamon leaf, Clove bud,  
143 Citronella, Geranium bourbon, Marjoram, Peppermint, Lemongrass (*Cymbopogon citratus*),  
144 Cornmint, Elemi, Ho wood, Head ease, Lemon eucalyptus, Litsea cubeba, Myrrh, Parsley  
145 seed, Coriander oil, Dillweed, Hyssop, Neroli, Rosewood oil), 6 (Cinnamon bark, Oregano,  
146 Thyme white, Bandit "Thieves", Lemongrass (*Cymbopogon flexuosus*), Sandalwood oil) and  
147 7 (Cinnamon bark, Oregano, Thyme white, Lemongrass (*Cymbopogon flexuosus*), Allspice,  
148 Amyris, Palmarosa) essential oils were found to have high activity against stationary phase *S.*  
149 *aureus* at 0.5%, 0.25% and 0.125% concentrations, respectively. When the drug exposure was  
150 extended to five days, additional 9 essential oils (Tea tree, Cajeput, Glove bud, Lavender,  
151 Sleep tight, Vetiver, Palo santo, Sage oil, Yarrow) and 4 essential oils (Health shield, Allspice,  
152 Amyris, Palmarosa) were found to be active at 0.5% and 0.25% concentration, respectively  
153 (Table 1). The top 10 essential oils (Cinnamon bark, Oregano, Thyme white, Lemongrass  
154 (*Cymbopogon flexuosus*), Bandit "Thieves", Sandalwood oil, Health shield, Allspice, Amyris,  
155 Palmarosa), which showed high activity at 0.25% concentration, were used in the subsequent  
156 testing to confirm their activity in inhibiting growth of *S. aureus* in MIC test and in CFU drug  
157 exposure assay for their activity against non-growing stationary phase *S. aureus*.

158

### 159 **MIC determination of the top active essential oils**

160 We carried out antibiotic susceptibility testing to determine the activity of the top 10 active  
161 essential oils against growing *S. aureus*. As shown in Table 2, Oregano, Amyris and  
162 Sandalwood oil were the most active agents in inhibiting the growth of *S. aureus*, with the  
163 lowest MIC of 0.015% in our study. The growth of *S. aureus* was efficiently suppressed by  
164 Cinnamon bark at 0.03%. Allspice could inhibit the growth of *S. aureus* with an MIC of  
165 0.06%, while Thyme white, Health shield, Bandit "Thieves", Lemongrass (*Cymbopogon*  
166 *flexuosus*) and Palmarosa had the same MIC of 0.125% against *S. aureus*. Clinical drug  
167 gentamicin included as a control inhibited the growth of *S. aureus* with an MIC of 1  $\mu$ g/mL.

168

### 169 **Comparison of active essential oils in their ability to kill stationary phase *S. aureus***

170 We first tested the activity of tosufloxacin and other clinically used drugs against stationary  
171 phase *S. aureus* at 20  $\mu$ M. As previously described [3], tosufloxacin could kill all stationary  
172 phase *S. aureus* cells after seven-day drug exposure, with no visible colonies remaining on  
173 TSB plate. Levofloxacin, ciprofloxacin and rifampin had weak activity with  $10^4$ ~ $10^5$   
174 CFU/mL cells remaining after seven-day exposure. In contrast, other clinical drugs including  
175 linezolid, vancomycin, sulfamethoxazole, trimethoprim, azithromycin and gentamicin did not

176 show obvious activity against stationary phase *S. aureus* even when the drug exposure was  
177 extended to seven days (Figure 1). In contrast, eight essential oils (Cinnamon bark, Oregano,  
178 Thyme white, Bandit "Thieves", Lemongrass (*Cymbopogon flexuosus*), Health shield,  
179 Allspice, Palmarosa) at 0.25% concentration could eradicate all stationary phase cells after  
180 one-day exposure. Meanwhile, Amyris could clear all the cells after three-day exposure  
181 whereas Sandalwood oil could not wipe out the stationary phase *S. aureus* cells after  
182 seven-day exposure. At a lower concentration of 0.125%, we noticed that Oregano,  
183 Lemongrass (*Cymbopogon flexuosus*) and Thyme white still exhibited strong activity against  
184 stationary phase *S. aureus*, and no CFU could be detected after one-day exposure (Figure 2).  
185 Meanwhile, Cinnamon bark, Allspice, Amyris and Palmarosa could eradicate stationary phase  
186 *S. aureus* cells after three-day exposure. On the other hand, Bandit "Thieves", Sandalwood oil  
187 and Health shield could not eradicate the stationary phase *S. aureus* culture even after  
188 seven-day exposure.

189

### 190 **Development of essential oil drug combinations to eradicate stationary phase *S. aureus*** 191 **in vitro**

192 It has been reported that synergistic activity between antibiotic and essential oil could occur,  
193 which achieved better bactericidal effect against growing *S. aureus* [12]. It is of great  
194 importance to include drugs that target persister bacteria in the treatment of infection diseases  
195 [4]. Based on our results, Oregano demonstrated high activity against not only log phase  
196 growing *S. aureus* with a low MIC but also stationary phase non-growing bacteria.  
197 Meanwhile, clinically used drugs had limited activity to kill *S. aureus* persisters. To more  
198 effectively eradicate the stationary phase *S. aureus*, we evaluated essential oil drug  
199 combinations using clinical drugs in combination with Oregano (0.025%). We found that  
200 some essential oil drug combinations were indeed much more effective than single drugs  
201 (Figure 3). Among them, rifampin + Oregano could completely eradicate all the stationary  
202 phase *S. aureus* after just one-day exposure. Tosufloxacin + Oregano could wipe out all  
203 stationary phase cells after three-day exposure. Meanwhile, levofloxacin + Oregano and  
204 ciprofloxacin + Oregano could kill all the stationary phase *S. aureus* after five-day exposure.  
205 These drug combinations showed much better activity than respective single drugs ( $10^4 \sim 10^6$   
206 CFU/mL cells remaining) and somewhat better activity than single Oregano ( $10^4$  CFU/mL  
207 remaining). In contrast, other essential oil drug combinations such as linezolid + Oregano,  
208 vancomycin + Oregano, sulfamethoxazole + Oregano, trimethoprim + Oregano, azithromycin  
209 + Oregano and gentamicin + Oregano had limited activity against stationary phase cells, with  
210  $10^4$  CFU/mL bacterial cells remaining even after five-day exposure, suggesting these  
211 combinations were not significantly better than Oregano alone ( $10^4$  CFU/mL remaining).

212

### 213 **Discussion**

214 *S. aureus* is known to give rise to a diverse range of infections from mild skin infections to  
215 serious diseases such as endocarditis and osteomyelitis and biofilm infections. Persisters are  
216 dormant phenotypic variants of bacterial cells that are tolerant to antibiotics and genetically  
217 identical drug susceptible kin [2]. Since persisters were first identified in 1944 [13], there is  
218 considerable evidence that drug-tolerant persisters are the contributors to *S. aureus* persistent  
219 and relapsing infections [2, 14, 15], Meanwhile, treatment of persistent *S. aureus* infections

220 has remained a challenge. It has been proposed to use persister drugs in the context of drug  
221 combination as in Yin-Yang model for more effective treatment of persistent infections [16].  
222 Although previous study has screened FDA-approved drug library to identify agents that have  
223 good activity against stationary phase *S. aureus* [3], only few useful hits such as tosufloxacin  
224 and clinafloaxin were identified. Although ADEP4, an experimental acyldepsipeptide  
225 antibiotic killing *S. aureus* persists in combination with rifampin has been reported to cure a  
226 deep wound infection in a mouse model [17], its validity in treating other persistent infections  
227 in other disease models remains to be confirmed. Thus, while it is of great importance to  
228 include drugs targeting persister bacteria in the treatment of *S. aureus* infections, the choice  
229 of persister drugs that may be useful is quite few. Since most studies of essential oil activity  
230 on *S. aureus* were performed on log phase growing bacteria [6, 7], here we set out to  
231 determine the activity of a large panel of essential oils against stationary phase *S. aureus*  
232 cultures enriched in persister bacteria. Interestingly, we identified a range of essential oils that  
233 have strong activity against stationary phase cultures of *S. aureus* that may be useful for more  
234 effective treatment of persistent *S. aureus* infections.

235  
236 Essential oils, a widely studied alternative against antibiotic resistant bacteria, are  
237 concentrated volatile liquids extracted from plants. While there are some reports on activity  
238 of essential oils against log phase *S. aureus*, the number of evaluated essential oils is small  
239 (just one or two kinds of essential oils) [6, 8], and their activity against stationary phase *S.*  
240 *aureus* cultures has not been studied [6, 8]. In this study, we evaluated a panel of 143  
241 essential oils for their activity against stationary phase *S. aureus*. We identified 9 essential  
242 oils (at 0.25% concentration) that are more active than persister drug tosufloxacin (20  $\mu$ M), a  
243 quinolone drug control that could eradicate stationary phase *S. aureus*. Among them, 7  
244 essential oils (Cinnamon bark, Oregano, Thyme white, Lemongrass (*Cymbopogon flexuosus*),  
245 Allspice, Amyris, Palmarosa) showed outstanding activity against stationary phase *S. aureus*  
246 at 0.125% concentration (Figure 2). Meanwhile, all of the top 9 essential oils showed high  
247 activity against growing *S. aureus* (Table 2), of which some essential oils such as Thyme  
248 white, Oregano and Cinnamon bark have been reported to have high activity against log  
249 phase *S. aureus* in previous studies [7, 18, 19], but Lemongrass (*Cymbopogon flexuosus*),  
250 Bandit "Thieves", Health shield, Allspice, Amyris, Palmarosa were first reported in this study.  
251 Compared with our previous work on activity of essential oils against stationary phase *E. coli*,  
252 some essential oils including Cinnamon bark, Oregano, Bandit "Thieves", Health shield and  
253 Allspice exhibited outstanding activity against both Gram-positive *S. aureus* and  
254 Gram-negative *E. coli* [20], while it seems that Thyme white, Lemongrass (*Cymbopogon*  
255 *flexuosus*), Amyris, Palmarosa just showed high activity against *S. aureus* [20], while  
256 Cinnamon leaf, Clove bud and *Syzygium aromaticum* were only active against *E. coli* [20].  
257 Moreover, although some studies indicate that certain active essential oils including their  
258 main active components such as carvacrol or eugenol could induce membrane damage by  
259 causing loss of cellular contents [9, 21, 22], there are limited studies available that focus on  
260 the active components and the mechanisms of antimicrobial action of essential oils in general.  
261 Here, we identified some active essential oils against stationary phase *S. aureus*. Further  
262 studies are needed to determine the main active components and the mechanisms of action of  
263 the active essential oils identified in this study.

264

265 Oregano is known to be one of the most effective essential oils against a wide variety of  
266 pathogens, including *Pseudomonas sp.*, *Salmonella sp.*, *Escherichia coli* and *Borrelia*  
267 *burgdorferi* [7, 23]. In this study, Oregano exhibited high activity against not only log phase  
268 growing *S. aureus* with a low MIC of 0.015% but also stationary phase non-growing bacteria  
269 with complete clearance without any regrowth at 0.125% concentration. Remarkably, when  
270 combined with some currently recommended antibiotics for *S. aureus* infections, Oregano  
271 showed a positive enhancement effect in increasing the activity of some antibiotics  
272 (quinolones, rifampin) against stationary phase *S. aureus* (Figure 3). When combined with  
273 rifampin, the combination showed outstanding activity with 100% clearance after just  
274 one-day exposure. When combined with tosufloxacin and two other quinolone drugs  
275 (levofloxacin and ciprofloxacin), the combinations could wipe out all stationary phase cells  
276 after three-day or five-day exposure. The synergistic effect of Oregano and the four drugs  
277 may have implications for improved treatment of *S. aureus* persistent infections. Further  
278 studies should be carried out to confirm if such combination approaches are useful in animal  
279 models.

280

281 Additionally, we found Cinnamon bark, Thyme white, Lemongrass (*Cymbopogon flexuosus*),  
282 Allspice, Amyris and Palmarosa showed excellent activity against stationary phase *S. aureus*  
283 at a low concentration of 0.125% (Figure 2). Cinnamon bark was reported to have  
284 activity against bacteria, fungi, inflammation, cancer and diabetes [24]. Also, it was  
285 demonstrated to be a potential antibacterial agent that exhibited strong activity against  
286 methicillin resistant *S. aureus* (MRSA) [25]. In this study, Cinnamon bark also showed its  
287 remarkable activity against non-growing stationary phase *S. aureus*. Thyme white, extracted  
288 from *Thymus zygis*, showed great activity against both log phase and stationary phase *S.*  
289 *aureus* at the same concentration of 0.125%. Essential oils obtained from *Thymus* species  
290 were often compared for their antibacterial and antioxidant activity. And oil from *Thymus*  
291 *zygis* was the most active one towards log phase Gram-positive and Gram-negative bacteria  
292 [18, 26]. Our results highlighted its antibacterial activity not only against growing *S. aureus*  
293 bacteria but also non-growing stationary phase cells. Lemongrass from two different plants  
294 (*Cymbopogon flexuosus* and *Cymbopogon citratus*) were evaluated in this study. While  
295 Lemongrass from *Cymbopogon flexuosus* could kill all the stationary phase *S. aureus* in just  
296 one day at 0.125%, Lemongrass from *Cymbopogon citratus* showed obvious activity only at a  
297 high concentration (0.5%). This provides the basis for further testing of *Cymbopogon*  
298 *flexuosus* in animal models of infection. Allspice is widely known as a popular spice in food  
299 processing [27], here, its activity against *S. aureus* may facilitate its usage for antibacterial  
300 purpose. Compared with other essential oils, there are few studies discussing bioactivity of  
301 Amyris. One study revealed that vapor delivery of Amyris could alter pyrethroid efficacy and  
302 detoxification enzyme activity in mosquitoes [28]. Our new finding of Amyris activity on *S.*  
303 *aureus* in this study may contribute to more bioactivity of Amyris and therapeutic use of  
304 *Amyris balsamifera*. Palmarosa, known as *Cymbopogon martini*, is used in Ayurvedic  
305 medicine to relieve nerve pain for skin problems and as a skin tonic in aromatherapy due to  
306 its antimicrobial properties [29]. While its immunomodulatory activity is based on geraniol  
307 [29], the main component of Palmarosa active against stationary phase *S. aureus* is unknown

308 and will be determined in the future.

309

310 Along with the essential oils which showed strong activity against *S. aureus* persists at  
311 0.125%, there were three essential oils (Bandit "Thieves", Sandalwood oil and Health shield)  
312 that showed obvious activity only at higher concentrations. Bandit "Thieves" and Health  
313 shield could eradicate all stationary phase cells after one-day exposure at 0.25%  
314 concentration. Sandalwood oil exhibited obvious activity at 0.5% concentration. Both Bandit  
315 "Thieves" and Health shield are synergy blend of essential oils. While Bandit "Thieves"  
316 contains clove, cinnamon, lemon, rosemary and eucalyptus oils, Health shield is a mixture of  
317 essential oils from cassia, clove, eucalyptus, lemon and rosemary. They were active against  
318 the growing of *S. aureus* with the same MIC value of 0.125% and showed similar activity  
319 against stationary phase *S. aureus* cells (Table 2 and Figure 2). Sandalwood oil in this study is  
320 obtained from *Santalum spicatum* (Australian Sandalwood). There are two other kinds of  
321 Sandalwood oil: East Indian Sandalwood oil extracted from *Santalum album* and New  
322 Caledonian Sandalwood oil prepared from the wood of *Santalum austrocaledonicum* [30].  
323 Sandalwood oil from East Indian is widely studied as an attractive natural therapeutic for  
324 inflammatory skin diseases [31]. On the other hand, Sandalwood oil from *Santalum spicatum*  
325 has high commercial value for applications in aromatherapy and for the production of  
326 cosmetics such as soaps, creams and powder [30]. In this study, Sandalwood oil extracted  
327 from *Santalum spicatum* showed high activity against *S. aureus*, which demonstrated that it  
328 may be a promising antibacterial agent.

329

330 In summary, this is the first study of a large collection of 143 essential oils for activity against  
331 stationary phase *S. aureus* where we identified several promising essential oils. The top hits  
332 are Oregano, Cinnamon bark, Thyme white, Lemongrass (*Cymbopogon flexuosus*), Bandit  
333 "Thieves", Sandalwood oil, Health shield, Allspice, Amyris, Palmarosa. Meanwhile, we  
334 found in drug combination study with essential oil (Oregano) and antibiotics that some potent  
335 combinations such as Oregano plus quinolones or rifampin could effectively eradicate *S.*  
336 *aureus* persists in vitro. Further studies should be carried out to identify the active  
337 components, evaluate safety, pharmacokinetics, and their activity to eradicate *S. aureus*  
338 persistent infections in animal models.

339

#### 340 **Funding**

341 We acknowledge the support by the Einstein-Sim Family Charitable Fund and Guangci  
342 Distinguished Young Scholars Program (GCQN-2017-C11).

343

#### 344 **References**

345 1. Springer MT, Singh VK, Cheung AL, Donegan NP, Chamberlain NR. Effect of clpP and clpC  
346 deletion on persister cell number in Staphylococcus aureus. J Med Microbiol. 2016;65(8):848-57. Epub  
347 2016/07/05. doi: 10.1099/jmm.0.000304. PubMed PMID: 27375177.

348 2. Conlon BP, Rowe SE, Gandt AB, Nuxoll AS, Donegan NP, Zalis EA, et al. Persister formation in



- 349 *Staphylococcus aureus* is associated with ATP depletion. *Nature Microbiology*. 2016;1(5). doi:  
350 10.1038/nmicrobiol.2016.51.
- 351 3. Niu H, Cui P, Yee R, Shi W, Zhang S, Feng J, et al. A Clinical Drug Library Screen Identifies  
352 Tosufloxacin as Being Highly Active against *Staphylococcus aureus* Persisters. *Antibiotics (Basel)*.  
353 2015;4(3):329-36. Epub 2015/01/01. doi: 10.3390/antibiotics4030329. PubMed PMID: 27025627;  
354 PubMed Central PMCID: PMC4790289.
- 355 4. Cui P, Niu H, Shi W, Zhang S, Zhang H, Margolick J, et al. Disruption of Membrane by Colistin  
356 Kills Uropathogenic *Escherichia coli* Persisters and Enhances Killing of Other Antibiotics. *Antimicrob*  
357 *Agents Chemother*. 2016;60(11):6867-71. Epub 2016/09/08. doi: 10.1128/AAC.01481-16. PubMed  
358 PMID: 27600051; PubMed Central PMCID: PMC475097.
- 359 5. Yee R, Yuan Y, Tarff A, Brayton C, Gour N, Feng J, et al. 2019. doi: 10.1101/686097.
- 360 6. Bouhdid S, Abrini J, Zhiri A, Espuny MJ, Manresa A. Investigation of functional and morphological  
361 changes in *Pseudomonas aeruginosa* and *Staphylococcus aureus* cells induced by *Origanum*  
362 *compactum* essential oil. *J Appl Microbiol*. 2009;106(5):1558-68. Epub 2009/02/20. doi:  
363 10.1111/j.1365-2672.2008.04124.x. PubMed PMID: 19226402.
- 364 7. Caillet S, Ursachi L, Shareck F, Lacroix M. Effect of gamma radiation and oregano essential oil on  
365 murein and ATP concentration of *Staphylococcus aureus*. *J Food Sci*. 2009;74(9):M499-508. Epub  
366 2010/05/25. doi: 10.1111/j.1750-3841.2009.01368.x. PubMed PMID: 20492121.
- 367 8. de Morais Oliveira-Tintino CD, Tintino SR, Limaverde PW, Figueredo FG, Campina FF, da Cunha  
368 FAB, et al. Inhibition of the essential oil from *Chenopodium ambrosioides* L. and alpha-terpinene on  
369 the NorA efflux-pump of *Staphylococcus aureus*. *Food Chem*. 2018;262:72-7. Epub 2018/05/13. doi:  
370 10.1016/j.foodchem.2018.04.040. PubMed PMID: 29751924.

- 371 9. Feng J, Shi W, Miklossy J, Tauxe GM, McMeniman CJ, Zhang Y. Identification of Essential Oils  
372 with Strong Activity against Stationary Phase *Borrelia burgdorferi*. *Antibiotics* (Basel). 2018;7(4). Epub  
373 2018/10/20. doi: 10.3390/antibiotics7040089. PubMed PMID: 30332754; PubMed Central PMCID:  
374 PMC6316231.
- 375 10. Feng J, Li T, Yee R, Yuan Y, Bai C, Cai M, et al. Stationary phase persister/biofilm microcolony of  
376 *Borrelia burgdorferi* causes more severe disease in a mouse model of Lyme arthritis: implications for  
377 understanding persistence, Post-treatment Lyme Disease Syndrome (PTLDS), and treatment failure.  
378 *Discovery medicine*. 2019;27(148):125-38. Epub 2019/04/05. PubMed PMID: 30946803.
- 379 11. Clinical and Laboratory Standards Institute. Performance Standards for Antimicrobial  
380 Susceptibility Testing; Seventeenth Informational Supplement. CLSI document M100-S17.  
381 2007;27(1):154-61.
- 382 12. Buldain D, Buchamer AV, Marchetti ML, Aliverti F, Bandoni A, Mestorino N. Combination of  
383 Cloxacillin and Essential Oil of *Melaleuca amillaris* as an Alternative Against *Staphylococcus aureus*.  
384 *Front Vet Sci*. 2018;5:177. Epub 2018/08/18. doi: 10.3389/fvets.2018.00177. PubMed PMID:  
385 30116728; PubMed Central PMCID: PMC6082948.
- 386 13. Conlon BP. *Staphylococcus aureus* chronic and relapsing infections: Evidence of a role for  
387 persister cells: An investigation of persister cells, their formation and their role in *S. aureus* disease.  
388 *Bioessays*. 2014;36(10):991-6. Epub 2014/08/08. doi: 10.1002/bies.201400080. PubMed PMID:  
389 25100240.
- 390 14. Bojer MS, Lindemose S, Vestergaard M, Ingmer H. Quorum Sensing-Regulated Phenol-Soluble  
391 Modulins Limit Persister Cell Populations in *Staphylococcus aureus*. *Front Microbiol*. 2018;9:255. Epub  
392 2018/03/09. doi: 10.3389/fmicb.2018.00255. PubMed PMID: 29515541; PubMed Central PMCID:

393 PMCPMC5826201.

394 15. Guo L, Xu R, Zhao Y, Liu D, Liu Z, Wang X, et al. Gas Plasma Pre-treatment Increases Antibiotic  
395 Sensitivity and Persister Eradication in Methicillin-Resistant *Staphylococcus aureus*. *Front Microbiol.*  
396 2018;9:537. Epub 2018/04/10. doi: 10.3389/fmicb.2018.00537. PubMed PMID: 29628915; PubMed  
397 Central PMCID: PMCPMC5876240.

398 16. Zhang Y. Persisters, persistent infections and the Yin-Yang model. *Emerg Microbes Infect.*  
399 2014;3(1):e3. Epub 2014/01/01. doi: 10.1038/emi.2014.3. PubMed PMID: 26038493; PubMed Central  
400 PMCID: PMCPMC3913823.

401 17. Mina EG, Marques CN. Interaction of *Staphylococcus aureus* persister cells with the host when in  
402 a persister state and following awakening. *Sci Rep.* 2016;6:31342. Epub 2016/08/11. doi:  
403 10.1038/srep31342. PubMed PMID: 27506163; PubMed Central PMCID: PMCPMC4979210.

404 18. Afonso AF, Pereira OR, Valega M, Silva AMS, Cardoso SM. Metabolites and Biological Activities  
405 of *Thymus zygis*, *Thymus pulegioides*, and *Thymus fragrantissimus* Grown under Organic Cultivation.  
406 *Molecules.* 2018;23(7). Epub 2018/06/23. doi: 10.3390/molecules23071514. PubMed PMID:  
407 29932435; PubMed Central PMCID: PMCPMC6099726.

408 19. Song X, Sun Y, Zhang Q, Yang X, Zheng F, He S, et al. Failure of *Staphylococcus aureus* to  
409 Acquire Direct and Cross Tolerance after Habituation to Cinnamon Essential Oil. *Microorganisms.*  
410 2019;7(1). Epub 2019/01/16. doi: 10.3390/microorganisms7010018. PubMed PMID: 30641977;  
411 PubMed Central PMCID: PMCPMC6352263.

412 20. Xiao S, Cui P, Shi W, Zhang Y. 2019. doi: 10.1101/702951.

413 21. Mith H, Clinquart A, Zhiri A, Daube G, Delcenserie V. The impact of oregano (*Origanum*  
414 *heracleoticum*) essential oil and carvacrol on virulence gene transcription by *Escherichia coli* O157:H7.

- 415 FEMS Microbiol Lett. 2015;362(1):1-7. Epub 2015/03/20. doi: 10.1093/femsle/fnu021. PubMed PMID:  
416 25790499.
- 417 22. Teixeira B, Marques A, Ramos C, Serrano C, Matos O, Neng NR, et al. Chemical composition and  
418 bioactivity of different oregano (*Origanum vulgare*) extracts and essential oil. J Sci Food Agric.  
419 2013;93(11):2707-14. Epub 2013/04/05. doi: 10.1002/jsfa.6089. PubMed PMID: 23553824.
- 420 23. Feng J, Zhang S, Shi W, Zubcevik N, Miklossy J, Zhang Y. Selective Essential Oils from Spice or  
421 Culinary Herbs Have High Activity against Stationary Phase and Biofilm *Borrelia burgdorferi*. Front  
422 Med (Lausanne). 2017;4:169. Epub 2017/10/28. doi: 10.3389/fmed.2017.00169. PubMed PMID:  
423 29075628; PubMed Central PMCID: PMC5641543.
- 424 24. Han X, Parker TL. Antiinflammatory Activity of Cinnamon (*Cinnamomum zeylanicum*) Bark  
425 Essential Oil in a Human Skin Disease Model. Phytother Res. 2017;31(7):1034-8. Epub 2017/04/27.  
426 doi: 10.1002/ptr.5822. PubMed PMID: 28444928; PubMed Central PMCID: PMC5518441.
- 427 25. Vong AT, Chong HW, Lim V. Preliminary Study of the Potential Extracts from Selected Plants to  
428 Improve Surface Cleaning. Plants (Basel). 2018;7(1). Epub 2018/03/07. doi: 10.3390/plants7010017.  
429 PubMed PMID: 29509658; PubMed Central PMCID: PMC5874606.
- 430 26. Ballester-Costa C, Sendra E, Fernandez-Lopez J, Viuda-Martos M. Evaluation of the antibacterial  
431 and antioxidant activities of chitosan edible films incorporated with organic essential oils obtained from  
432 four *Thymus* species. J Food Sci Technol. 2016;53(8):3374-9. Epub 2016/10/28. doi:  
433 10.1007/s13197-016-2312-y. PubMed PMID: 27784932; PubMed Central PMCID: PMC5055899.
- 434 27. Yilmaz S, Ergun S. Dietary Supplementation with Allspice *Pimenta dioica* Reduces the  
435 Occurrence of Streptococcal Disease during First Feeding of Mozambique Tilapia Fry. J Aquat Anim  
436 Health. 2014;26(3):144-8. Epub 2014/09/18. doi: 10.1080/08997659.2014.893459. PubMed PMID:

437 25229484.

438 28. O'Neal ST, Johnson EJ, Rault LC, Anderson TD. Vapor delivery of plant essential oils alters  
439 pyrethroid efficacy and detoxification enzyme activity in mosquitoes. *Pestic Biochem Physiol.*  
440 2019;157:88-98. Epub 2019/06/04. doi: 10.1016/j.pestbp.2019.03.007. PubMed PMID: 31153481.

441 29. Murbach Teles Andrade BF, Conti BJ, Santiago KB, Fernandes Junior A, Sforcin JM.  
442 *Cymbopogon martinii* essential oil and geraniol at noncytotoxic concentrations exerted  
443 immunomodulatory/anti-inflammatory effects in human monocytes. *J Pharm Pharmacol.*  
444 2014;66(10):1491-6. Epub 2014/06/18. doi: 10.1111/jphp.12278. PubMed PMID: 24934659.

445 30. de Groot AC, Schmidt E. Essential Oils, Part VI: Sandalwood Oil, Ylang-Ylang Oil, and Jasmine  
446 Absolute. *Dermatitis.* 2017;28(1):14-21. Epub 2016/12/22. doi: 10.1097/DER.0000000000000241.  
447 PubMed PMID: 28002230.

448 31. Sharma M, Levenson C, Clements I, Castella P, Gebauer K, Cox ME. East Indian Sandalwood Oil  
449 (EISO) Alleviates Inflammatory and Proliferative Pathologies of Psoriasis. *Front Pharmacol.*  
450 2017;8:125. Epub 2017/04/01. doi: 10.3389/fphar.2017.00125. PubMed PMID: 28360856; PubMed  
451 Central PMCID: PMC5352686.

452

453

454

**Table 1. Effect of essential oils on stationary phase *Staphylococcus aureus***

| EO <sup>a</sup>  | Plant                         | Viability of bacteria after 3 or 5 days of exposure <sup>b</sup> |        |                       |        |                        |        |
|------------------|-------------------------------|------------------------------------------------------------------|--------|-----------------------|--------|------------------------|--------|
|                  |                               | 0.5% EO <sup>a</sup>                                             |        | 0.25% EO <sup>a</sup> |        | 0.125% EO <sup>a</sup> |        |
|                  |                               | 3 days                                                           | 5 days | 3 day                 | 5 days | 3 day                  | 5 days |
| Cinnamon bark    | <i>Cinnamomum zeylanicum</i>  | -                                                                | -      | -                     | -      | -                      | -      |
| Oregano          | <i>Origanum vulgare</i>       | -                                                                | -      | -                     | -      | -                      | -      |
| Thyme white      | <i>Thymus zygis</i>           | -                                                                | -      | -                     | -      | -                      | -      |
| Lemongrass       | <i>Cymbopogon flexuosus</i>   | -                                                                | -      | -                     | -      | -                      | -      |
| Bandit "Thieves" | Synergy blend                 | -                                                                | -      | -                     | -      | +                      | +      |
| Sandalwood oil   | <i>Santalum Spicatum</i>      | -                                                                | -      | -                     | -      | +                      | +      |
| Health shield    | Synergy blend                 | -                                                                | -      | +                     | -      | +                      | +      |
| Allspice         | <i>Pimenta officinalis</i>    | -                                                                | -      | +                     | -      | -                      | -      |
| Amyris           | <i>Amyris balsamifera</i>     | -                                                                | -      | +                     | -      | -                      | -      |
| Palmarosa        | <i>Cymbopogon martinii</i>    | -                                                                | -      | +                     | -      | -                      | -      |
| Cinnamon leaf    | <i>Cinnamomum zeylanicum</i>  | -                                                                | -      | +                     | +      | +                      | +      |
| Clove bud        | <i>Eugenia caryophyllata</i>  | -                                                                | -      | +                     | +      | +                      | +      |
| Citronella       | <i>Cymbopogon winterianus</i> | -                                                                | -      | +                     | +      | +                      | +      |
| Geranium bourbon | <i>Pelargonium graveolens</i> | -                                                                | -      | +                     | +      | +                      | +      |
| Marjoram (Sweet) | <i>Origanum marjorana</i>     | -                                                                | -      | +                     | +      | +                      | +      |
| Peppermint       | <i>Mentha piperita</i>        | -                                                                | -      | +                     | +      | +                      | +      |
| Lemongrass       | <i>Cymbopogon citratus</i>    | -                                                                | -      | +                     | +      | +                      | +      |
| Cornmint         | <i>Menta arvensis</i>         | -                                                                | -      | +                     | +      | +                      | +      |
| Elemi            | <i>Canarium iuzonicum</i>     | -                                                                | -      | +                     | +      | +                      | +      |
| Ho wood          | <i>Cinnamomum camphora</i>    | -                                                                | -      | +                     | +      | +                      | +      |
| Head ease        | Synergy blend                 | -                                                                | -      | +                     | +      | +                      | +      |
| Lemon eucalyptus | <i>Eucalyptus citriadora</i>  | -                                                                | -      | +                     | +      | +                      | +      |
| Litsea cubeba    | <i>Litsea cubeba</i>          | -                                                                | -      | +                     | +      | +                      | +      |
| Myrrh            | <i>Commiphora myrrha</i>      | -                                                                | -      | +                     | +      | +                      | +      |
| Parsley seed     | <i>Petroselinum sativum</i>   | -                                                                | -      | +                     | +      | +                      | +      |
| Coriander oil    | <i>Coriandrum sativum</i>     | -                                                                | -      | +                     | +      | +                      | +      |
| Dillweed         | <i>Anethum graveolens</i>     | -                                                                | -      | +                     | +      | +                      | +      |
| Hyssop           | <i>Hyssopus officinalis</i>   | -                                                                | -      | +                     | +      | +                      | +      |
| Neroli           | <i>Citrus aurantium</i>       | -                                                                | -      | +                     | +      | +                      | +      |
| Rosewood oil     | <i>Aniba rosaeodora</i>       | -                                                                | -      | +                     | +      | +                      | +      |
| Tea Tree         | <i>Melaleuca alternifolia</i> | +                                                                | -      | +                     | +      | +                      | +      |
| Cajeput          | <i>Melaleuca cajeputi</i>     | +                                                                | -      | +                     | +      | +                      | +      |
| Glove Bud        | <i>Syzygium aromaticum</i>    | +                                                                | -      | +                     | +      | +                      | +      |
| Lavender         | <i>Lavendula officinalis</i>  | +                                                                | -      | +                     | +      | +                      | +      |
| Sleep tight      | Synergy blend                 | +                                                                | -      | +                     | +      | +                      | +      |
| Vetiver          | <i>Vetiveria zizanioides</i>  | +                                                                | -      | +                     | +      | +                      | +      |
| Palo Santo       | <i>Bursera graveolens</i>     | +                                                                | -      | +                     | +      | +                      | +      |
| Sage oil         | <i>Salvia officinalis</i>     | +                                                                | -      | +                     | +      | +                      | +      |
| Yarrow           | <i>Achillea millefolium</i>   | +                                                                | -      | +                     | +      | +                      | +      |

455 <sup>a</sup> "EO" essential oil.

456    <sup>b</sup> “-” No obvious colonies grew on TSB plate after drug exposure; “+” Obvious colonies were found on TSB plate  
457    after drug exposure.  
458  
459

460 **Table 2. Activity of top 10 essential oils that are active against stationary phase *Staphylococcus aureus* in terms**  
 461 **of their activity against growing bacteria (MIC) and non-growing bacteria in drug exposure**

| Drug /essential oil | Plant                                                   | MIC (µg/mL /%) | Viability of bacteria after 3 or 5 days of EO <sup>b</sup> exposure (0.25%) <sup>c</sup> |        |
|---------------------|---------------------------------------------------------|----------------|------------------------------------------------------------------------------------------|--------|
|                     |                                                         |                | 3 day                                                                                    | 5 days |
|                     |                                                         |                | Gentamicin <sup>a</sup>                                                                  | -      |
| Sandalwood oil      | <i>Santalum spicatum</i>                                | 0.015          | -                                                                                        | -      |
| Amyris              | <i>Amycris balsamifera</i>                              | 0.015          | +                                                                                        | -      |
| Oregano             | <i>Origanum vulgare</i>                                 | 0.015          | +                                                                                        | -      |
| Cinnamon bark       | <i>Cinnamomum zeylanicum</i>                            | 0.03           | -                                                                                        | -      |
| Allspice            | <i>Pimenta officinalis</i>                              | 0.06           | +                                                                                        | -      |
| Thyme white         | <i>Thymus zygis</i>                                     | 0.125          | -                                                                                        | -      |
| Health shield       | <i>Cassia, clove, eucalyptus, lemon and rosemary</i>    | 0.125          | +                                                                                        | -      |
| Bandit "Thieves"    | <i>cloves, cinnamon, lemon, rosemary and eucalyptus</i> | 0.125          | -                                                                                        | -      |
| Lemongrass          | <i>Cymbopogon flexuosus</i>                             | 0.125          | -                                                                                        | -      |
| Palmarosa           | <i>Cymbopogon martinii</i>                              | 0.125          | +                                                                                        | -      |

462 <sup>a</sup> The concentration of gentamicin used in drug exposure was 50 µM; <sup>b</sup> "EO" essential oil; <sup>c</sup> "-" No obvious  
 463 colonies grew on TSB plate after drug exposure; "+" Obvious colonies were found on TSB plate after drug  
 464 exposure.  
 465



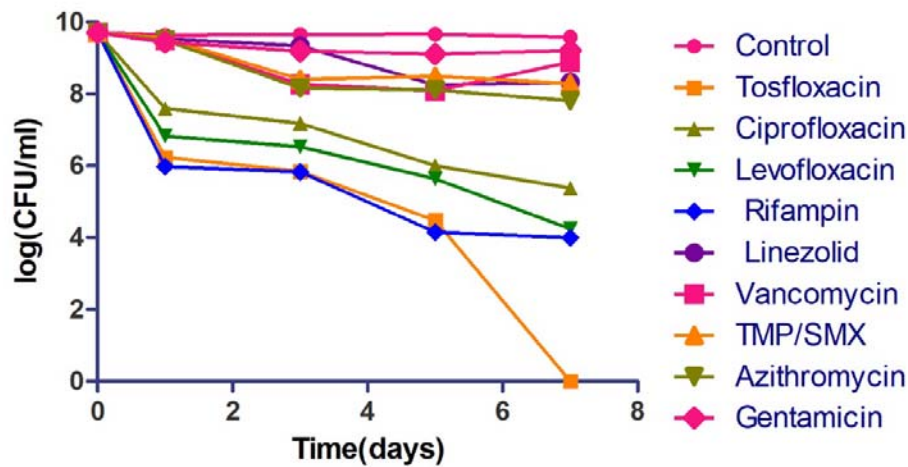

466

467 **Figure 1. Activity of tosufloxacin and commonly used antibiotics against stationary phase *S. aureus*.**

468 Tosufloxacin had good anti-persister activity against *S. aureus*. Antibiotics commonly used to treat infections  
469 caused by *S. aureus* had poor activity against the stationary phase bacteria. The final concentration of antibiotics  
470 including tosufloxacin, ciprofloxacin, levofloxacin, rifampin, linezolid, vancomycin, sulfamethoxazole,  
471 trimethoprim, azithromycin and gentamicin, was all 20  $\mu$ M. Sulfamethoxazole-trimethoprim is the combination  
472 of trimethoprim and sulfamethoxazole in a ratio of 5:1.

473

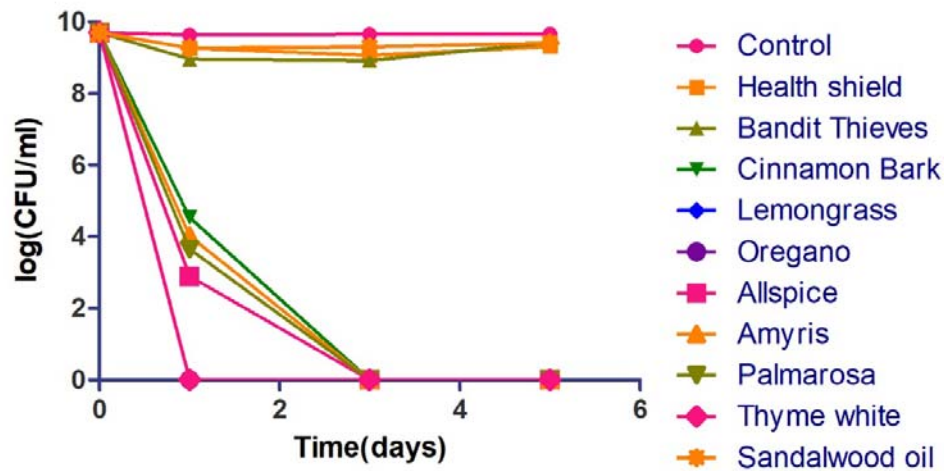

474

475

**Figure 2. Activity of active essential oil candidates (0.125%) against stationary phase *S. aureus*.** Oregano,

476

Lemongrass (*Cymbopogon flexuosus*) and Thyme white could eradicate all stationary phase cells after one-day oil

477

exposure. Cinnamon bark, Allspice, Amyris and Palmarosa could eradicate stationary phase *S. aureus* cells after

478

three-day exposure. Bandit "Thieves", Sandalwood oil and Health shield still could not wipe out the *S. aureus*

479

stationary phase culture even after five-day exposure.

480

481

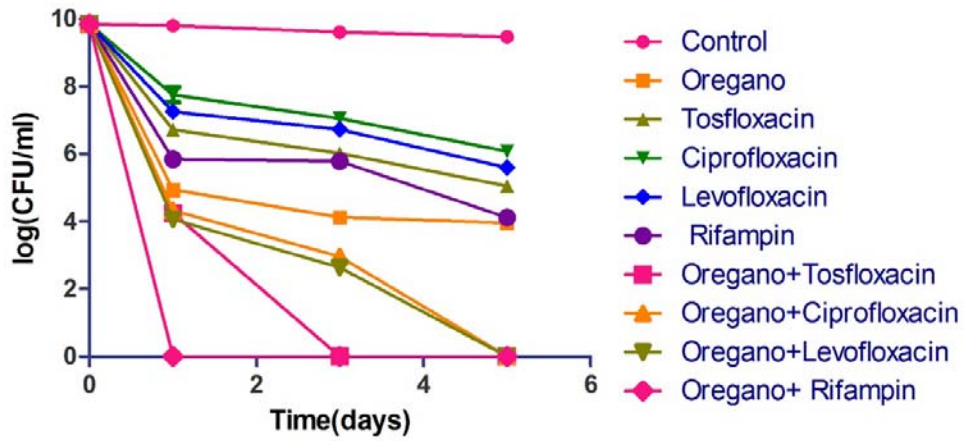

A

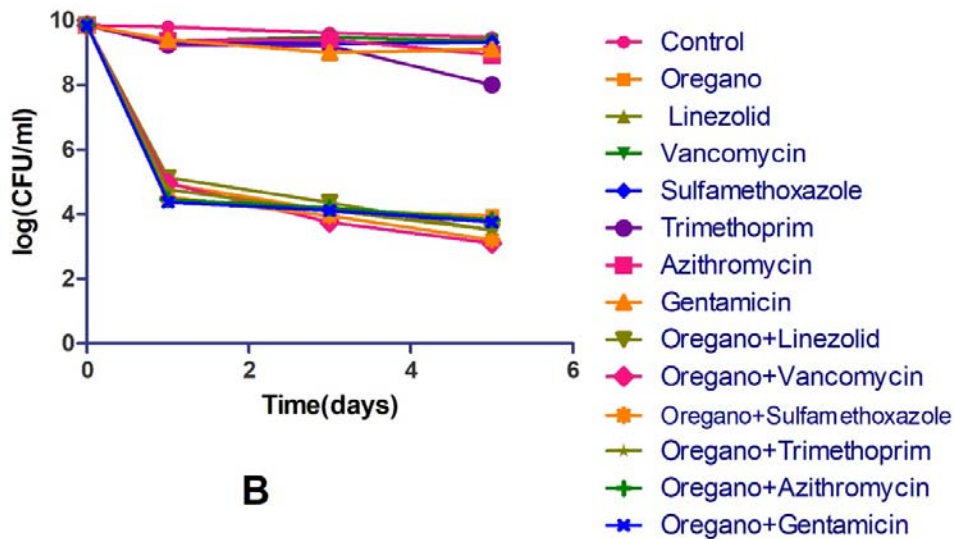

B

482

483

484

485

486

487

488

489

**Figure 3. Comparison of the activity of Oregano in combination with different antibiotics against stationary phase *S. aureus*.** Effects of ciprofloxacin, levofloxacin, tosufloxacin, rifampin alone and their combinations with Oregano are presented in (A). Effects of linezolid, vancomycin, sulfamethoxazole, trimethoprim, azithromycin, gentamicin and their combinations with Oregano are presented in (B). The final concentration of antibiotics is 5  $\mu\text{g}/\text{mL}$  and the concentration of Oregano is 0.025%.
